# Supplementary material
Source: PubMed Central journal article supplement (PMC4988198)
Supplement: AEM.01166-16_zam999117379so1.pdf [file AEM.01166-16_zam999117379so1.pdf]

|      | derivation | R12 | S12-1 | S12-3 | R18 | R26 | S50 |
|------|------------|-----|-------|-------|-----|-----|-----|
| PA12 | dog        | C   | C     | F     | C   | C   | C   |
| PA18 | dog        | N   | N     | N     | C   | N   | N   |
| PA26 | dog        | N   | N     | N     | F   | C   | T   |
| PA50 | dog        | N   | N     | N     | T   | C   | C   |

Supplemental FIG 1 Phage specificity against *P. aeruginosa* isolated from dogs. C; Clear plaques (white boxes) indicate combinations resulting in the highest lysis activity, followed by T; turbid plaques (light gray boxes) and F; faint plaques (dark gray boxes); black boxes indicate combinations resulting in no plaque formation (N).

## Supplemental Figure 1
